# Supplementary material for: Impact of Cold Spells on Community-Acquired Pneumonia Incidence
Source: Research Square preprint supplement (doi:10.21203/rs.3.rs-7515402/v1), 2025-10-20
Supplement: Supplementary file 1 [file fae6217d1014812b34719e16.xlsx]

## Sheet: Sheet1
DATE	TOTAL PATIENT	WOMEN	MEN	64 YEARS OLD AND BELOW	65 YEARS OLD AND ABOVE	MAXIMUM TEMPERATURE	MINIMUM TEMPERATURE	MEAN TEMPERATURE
2023-12-26						17.1	8.4	12.3
2023-12-27						17	9.6	12.7
2023-12-28						18.5	9.2	13.2
2023-12-29						16.7	7.8	11
2023-12-30						15.8	5.8	10
2023-12-31						13.7	5	8.8
2024-01-01						13.5	7.1	9.8
2024-01-02	69	25	44	44	25	16.6	9.4	11.8
2024-01-03	105	46	59	79	26	13.2	9.9	11
2024-01-04	54	25	29	28	26	18.7	11.4	13.2
2024-01-05	65	32	33	40	25	18.8	12	14.8
2024-01-08	69	40	29	38	31	14.3	5.9	10.1
2024-01-09	49	23	26	21	28	15.2	8.4	11.3
2024-01-10	50	26	24	29	21	12.7	9.6	10.8
2024-01-11	31	15	16	24	7	14	8.7	10.7
2024-01-12	45	26	19	27	18	10.2	7.7	9.1
2024-01-15	87	43	44	57	30	9.5	6.3	8
2024-01-16	87	37	50	54	33	9.2	6.9	7.8
2024-01-17	57	30	27	35	22	10.7	8.1	10.1
2024-01-18	65	35	30	40	25	12.7	10.1	10.9
2024-01-19	69	40	29	48	21	14	10.9	11.9
2024-01-22	79	44	35	54	25	16.9	9	12.8
2024-01-23	87	46	41	54	33	14.3	11.1	12.1
2024-01-24	79	47	32	42	37	17.6	7.9	12
2024-01-25	75	44	31	45	30	12.1	3	6.9
2024-01-26	73	33	40	49	24	9	4.8	6.6
2024-01-29	82	41	41	59	23	10.2	3.7	7.1
2024-01-30	73	34	39	55	18	7.6	4.6	5.8
2024-01-31	62	38	24	38	24	7.3	6.3	6.8
2024-02-01	50	21	29	26	24	13.5	5.2	9.6
2024-02-02	54	27	27	29	25	14.5	1.9	7.3
2024-02-05	123	58	65	82	41	12.5	7.9	9.5
2024-02-06	70	28	42	44	26	18.1	4.5	10.2
2024-02-07	110	57	53	67	43	19.2	13.4	15.8
2024-02-08	78	43	35	48	30	15.1	9	12.1
2024-02-09	104	47	57	56	48	17	9.9	12.6
2024-02-12	119	58	63	81	38	18.2	9.5	13.3
2024-02-13	114	55	59	76	38	17.7	12.5	15.1
2024-02-14	92	45	47	66	26	16.4	11.4	13.5
2024-02-15	97	48	49	66	31	16.3	8.3	11.4
2024-02-16	101	43	58	66	35	14.2	9	11
2024-02-19	96	46	50	65	31	13.8	8.9	10.7
2024-02-20	77	34	43	51	26	16.4	5.6	10.8
2024-02-21	79	38	41	56	23	15.5	6.4	10.5
2024-02-22	61	30	31	43	18	18.4	7.7	11.9
2024-02-23	57	35	22	36	21	18.8	6	11.6
2024-02-26	107	50	57	64	43	16	8.3	12.2
2024-02-27	107	56	51	71	36	16.3	6.1	10.9
2024-02-28	88	46	40	52	36	17.7	4.4	10.3
2024-02-29	73	38	35	54	19	18.7	4.3	11.2
2024-03-01	70	39	31	43	27	19.3	6	11.6
2024-03-04	116	64	52	76	40	19.4	4.8	11.8
2024-03-05	93	44	49	67	26	20.4	7.9	14.1
2024-03-06	96	43	53	59	37	18.3	9	12.3
2024-03-07	56	22	34	36	20	19	9	12.7
2024-03-08	57	25	32	43	14	18.9	6.7	12.7
2024-03-11	138	70	68	92	46	19.4	5.1	11.6
2024-03-12	86	45	41	65	21	20.5	5.1	11.9
2024-03-13	107	52	55	84	23	21.6	8.6	14.3
2024-03-14	93	47	46	59	34	20.3	8.2	14.7
2024-03-15	101	50	51	73	28	17.8	9.2	12.7
2024-03-18	108	49	59	73	35	16.7	11.4	13.2
2024-03-19	76	43	33	56	20	17.4	8.4	12
2024-03-20	90	45	45	54	36	18.6	10.8	15.1
2024-03-21	58	32	26	42	16	14.4	10.6	12
2024-03-22	76	31	45	51	25	16.6	7.9	12.3
2024-03-25	81	43	38	58	23	17.8	6.5	12.4
2024-03-26	60	26	34	41	19	19.3	12.6	15.7
2024-03-27	77	41	36	51	26	19.7	13	16
2024-03-28	75	31	44	55	20	21.8	11.5	16.4
2024-03-29	81	39	42	50	31	22.9	13.1	17.5
2024-04-01	91	44	47	64	27	28.9	11.5	19.4
2024-04-02	77	38	39	54	23	31.2	10.2	19.3
2024-04-03	67	28	39	43	24	28.1	11.5	19.1
2024-04-04	46	17	29	30	16	25.9	13.1	20
2024-04-05	75	39	36	48	27	22.7	15.5	18.4
2024-04-15	100	48	52	62	38	27.2	14.2	20.1
2024-04-16	85	40	45	53	32	30.7	11.2	19.7
2024-04-17	76	31	45	44	32	30.7	13.1	21
2024-04-18	65	29	36	42	23	29.6	16.5	21.5
2024-04-19	58	32	26	38	20	23.1	17	20.3
2024-04-22	60	29	31	39	21	22.9	13	18.2
2024-04-24	77	40	37	49	28	34.6	16.6	24.2
2024-04-25	57	38	19	36	21	34.6	17.7	25.7
2024-04-26	44	21	23	25	19	33.2	19.3	25
2024-04-29	36	13	23	20	16	30.8	18	23.1
2024-04-30	51	23	28	43	8	29.3	17.4	22.6
2024-05-02	49	23	26	30	19	25.8	18.7	21.5
2024-05-03	38	22	16	24	14	23.1	14.4	19.7
2024-05-06	72	34	38	48	24	21	11.7	15.8
2024-05-07	47	28	19	35	12	25	11.1	17.7
2024-05-08	48	18	30	32	16	24.1	15	19.4
2024-05-09	47	24	23	35	12	29.5	12.5	20.1
2024-05-10	32	17	15	20	12	30.7	14.2	22.3
2024-05-13	58	25	33	34	24	21.3	12.9	16.6
2024-05-14	52	20	32	33	19	22.1	12.2	17.7
2024-05-15	43	20	23	26	17	24.7	12.8	18.3
2024-05-16	29	12	17	19	10	23.8	14.2	19.4
2024-05-17	44	23	21	35	9	25.5	14.8	20
2024-05-20	59	35	24	45	14	27.2	18.5	22.8
2024-05-21	49	28	21	34	15	27.6	18.3	22.6
2024-05-22	33	17	16	23	10	27.8	19.6	23.3
2024-05-23	12	6	6	7	5	27.9	21.3	24
2024-05-24	23	7	16	16	7	24.6	16.4	21.7
2024-05-27	56	31	25	32	24	30.3	14.9	21.9
2024-05-28	54	26	28	40	14	26.3	20.2	23.1
2024-05-29	61	27	34	44	17	25.4	15.8	21
2024-05-30	43	19	24	29	14	24.9	18.7	21.6
2024-05-31	33	17	16	23	10	25.9	19	22
2024-06-03	52	23	29	33	19	38.8	17.3	27.7
2024-06-04	32	19	13	23	9	41.4	19	29.2
2024-06-05	39	16	23	26	13	40.1	19.9	28.5
2024-06-06	30	15	15	21	9	39.3	20	28.4
2024-06-07	32	14	18	21	11	38.2	22.7	29.9
2024-06-10	61	29	32	39	22	30.1	22.3	25.8
2024-06-11	34	21	13	23	11	29.8	20.6	25.6
2024-06-12	37	14	23	29	8	30.3	23.1	26.1
2024-06-13	26	17	9	14	12	33.5	22.2	28.1
2024-06-14	24	11	13	22	2	40.2	22.9	30.3
2024-06-24	66	33	33	51	15	31.3	25.2	27.6
2024-06-25	43	20	23	26	17	31.2	25.5	27.5
2024-06-26	53	31	22	41	12	31.3	24.6	27.5
2024-06-27	27	9	18	12	15	31	22.3	27.1
2024-06-28	36	14	22	23	13	31.7	24.6	27.6
2024-07-01	56	26	30	43	13	32.3	24.6	27.9
2024-07-02	37	19	18	21	16	35.2	24	28.4
2024-07-03	40	16	24	25	15	32.1	24.5	28.2
2024-07-04	43	24	19	30	13	32.5	24.7	28.2
2024-07-05	21	9	12	15	6	31.7	22.6	27.2
2024-07-08	53	22	31	40	13	32.2	25.6	28.2
2024-07-09	43	17	26	25	18	32.5	25.8	28.5
2024-07-10	39	22	17	23	16	33.9	23.5	28.6
2024-07-11	41	16	25	29	12	34.5	24.4	29.3
2024-07-12	29	16	13	20	9	33.3	26.2	29.4
2024-07-16	31	17	14	23	8	32.6	26.5	29
2024-07-17	45	22	23	30	15	32.2	26.1	28.6
2024-07-18	35	18	17	23	12	32.6	26.1	28.8
2024-07-19	30	16	14	23	7	33.4	26.6	29.4
2024-07-22	54	32	22	30	24	34.4	26.3	29.5
2024-07-23	27	13	14	21	6	34	27.5	29.9
2024-07-24	33	18	15	19	14	32.8	27.1	29.3
2024-07-25	36	14	22	22	14	33	27.2	29.5
2024-07-26	25	14	11	15	10	33.6	26.6	29
2024-07-29	51	26	25	29	22	33.7	23.9	29.5
2024-07-30	43	20	23	24	19	34.2	26.2	29.7
2024-07-31	43	22	21	27	16	33.2	27	29.5
2024-08-01	30	10	20	15	15	33.1	26.5	29.1
2024-08-02	38	16	22	26	12	33.9	26.6	29.3
2024-08-05	60	29	31	33	27	32.7	26.3	28.7
2024-08-06	42	19	23	31	11	34.2	26.4	29.4
2024-08-07	36	20	16	27	9	32.3	25.8	28.4
2024-08-08	26	16	10	18	8	32	26	28.4
2024-08-09	18	7	11	15	3	31.7	26.2	28.5
2024-08-12	50	23	27	35	15	33.5	25.8	29
2024-08-13	31	13	18	24	7	33.2	26.7	29.3
2024-08-14	38	19	19	20	18	33	25.8	28.8
2024-08-15	37	20	17	22	15	33.2	26	28.8
2024-08-16	32	17	15	20	12	32.7	26.7	29
2024-08-19	52	22	30	38	14	33.3	25.5	28.7
2024-08-20	28	14	14	21	7	31.6	26	28.1
2024-08-21	39	17	22	24	15	31.3	26.1	28.1
2024-08-22	39	19	20	27	12	33.6	26.3	29.1
2024-08-23	27	11	16	19	8	32.2	23.1	27.8
2024-08-26	45	21	24	33	12	33	25.2	28.8
2024-08-27	27	12	15	20	7	32.8	23.3	28.4
2024-08-28	39	19	20	27	12	31.4	25.5	28
2024-08-29	25	12	13	13	12	32.8	26	28.3
2024-09-02	54	24	30	35	19	31	23	26.9
2024-09-03	38	18	20	25	13	32.1	21.2	26.7
2024-09-04	42	21	21	27	15	31.3	25.1	27.5
2024-09-05	33	18	15	23	10	32.3	25.4	27.8
2024-09-06	22	9	13	18	4	31.5	25.5	27.9
2024-09-09	64	23	41	49	15	35.6	21.8	27.6
2024-09-10	47	24	23	29	18	31.6	22.9	27.2
2024-09-11	31	17	14	22	9	31.1	22.8	26.7
2024-09-12	41	22	19	29	12	32.2	22	27.5
2024-09-13	32	15	17	22	10	32.5	25.3	27.9
2024-09-16	49	18	31	32	17	30	24.4	26.5
2024-09-17	50	25	25	29	21	30.5	22.6	26.2
2024-09-18	47	28	19	28	19	30.2	22.5	25.9
2024-09-19	34	20	14	24	10	29.1	19	24.5
2024-09-20	25	14	11	18	7	29.3	21	24.8
2024-09-23	62	37	25	44	18	28.7	17.7	22.2
2024-09-24	40	16	24	26	14	30.8	16.4	23
2024-09-25	44	22	22	28	16	31.3	16.2	23.2
2024-09-26	33	15	18	28	5	32.4	16.6	23.8
2024-09-27	31	14	17	18	13	31.1	17.9	24.4
2024-09-30	52	20	32	40	12	30	20.5	25.3
2024-10-01	47	22	25	31	16	27.6	20.3	24
2024-10-02	36	19	17	23	13	28.2	18.3	22.8
2024-10-03	40	17	23	24	16	29.2	14.9	21.9
2024-10-04	28	12	16	18	10	32.2	15.2	22
2024-10-07	59	29	30	38	21	32.1	18.7	24.2
2024-10-08	53	24	29	40	13	28.7	20	24.5
2024-10-09	39	15	24	33	6	31	18.2	24.1
2024-10-10	48	23	25	37	11	30.8	17.6	23.6
2024-10-11	41	16	25	36	5	28.1	17.6	23.3
2024-10-14	70	25	45	42	28	29.2	20.1	24
2024-10-15	49	18	31	31	18	25.4	18.1	21.1
2024-10-16	50	23	27	35	15	29.5	17.4	26.6
2024-10-17	59	25	34	40	19	28.3	20.6	24.1
2024-10-18	26	12	14	13	13	25.4	17.7	21.7
2024-10-21	56	25	31	36	20	24.1	9.6	16.4
2024-10-22	48	22	26	34	14	22.7	14.6	19
2024-10-23	40	18	22	26	14	24.3	7.1	15.8
2024-10-24	48	20	28	26	22	26	6.9	15.6
2024-10-25	21	9	12	12	9	25.9	9.3	16.8
2024-10-28	43	20	23	27	16	26	10.2	16.8
2024-10-30	60	24	36	41	19	26.1	10.8	17.4
2024-10-31	42	21	21	22	20	24.5	12.8	18
2024-11-01	39	14	25	28	11	27	13.7	19.7
2024-11-04	55	22	33	39	16	22.4	11.9	16
2024-11-05	71	35	36	50	21	23.5	9.4	15.7
2024-11-06	49	23	26	37	12	22.4	11.2	15.8
2024-11-07	55	25	30	40	15	23.7	10.4	16.7
2024-11-08	29	13	16	22	7	24.2	12.1	17
2024-11-11	51	23	28	29	22	21.3	12	16.1
2024-11-12	53	28	25	44	9	23	10.1	15.2
2024-11-13	58	23	35	38	20	22.6	8.2	15.1
2024-11-14	46	21	25	27	19	22.7	9.5	15.7
2024-11-15	36	18	18	25	11	22.4	9	14.8
2024-11-18	83	35	48	51	32	19.2	11.9	14.1
2024-11-19	57	31	26	37	20	17.5	9.6	12.9
2024-11-20	51	25	26	42	9	17.9	10.4	13.4
2024-11-21	43	19	24	26	17	17.6	10.6	13.6
2024-11-22	34	16	18	21	13	17.3	11.6	13.9
2024-11-25	51	33	18	27	24	12.8	3.4	9.2
2024-11-26	51	22	29	32	19	13.6	2.3	7.6
2024-11-27	42	21	21	31	11	13.7	5.8	8.8
2024-11-28	41	18	23	31	10	14.3	2.9	7.3
2024-11-29	37	15	22	31	6	14.2	3.1	7.5
2024-12-02	61	29	32	39	22	15	2	7.1
2024-12-03	63	25	38	43	20	15.2	3	8.4
2024-12-04	58	24	34	38	20	14.2	7.9	10.9
2024-12-05	46	25	21	32	14	18.4	8.8	12.7
2024-12-06	47	21	26	27	20	17.3	4.8	10.9
2024-12-09	77	36	41	50	27	18.3	4.5	10.7
2024-12-10	76	43	33	49	27	18.8	7.3	11.9
2024-12-11	81	34	47	52	29	17.3	7.6	11.6
2024-12-12	65	38	27	47	18	15	8.1	10.9
2024-12-13	57	25	32	36	21	17.3	5.8	10.6
2024-12-16	55	28	27	37	18	11.1	1.3	6.2
2024-12-17	61	37	24	30	31	12.4	2	6.4
2024-12-18	57	26	31	40	17	13	2.4	6.4
2024-12-19	60	27	33	33	27	15.5	3.4	8.5
2024-12-20	81	43	38	48	33	14.9	5.2	9.4
2024-12-23	69	45	24	41	28	10.1	8.9	9.3
2024-12-24	85	50	35	47	38	11.7	9.1	10.1
2024-12-25	37	15	22	25	12	15.8	9.9	12.4
2024-12-26	55	25	30	41	14	14.4	9.5	11.8
2024-12-27	65	32	33	37	28	10.9	7	9.4
2024-12-30	72	46	26	55	17	12	9.7	11
